# Supplementary material for: Isolation, structure elucidation and total synthesis of a cytotoxic dienone from Echinacea pallida
Source: Royal Society of Chemistry journal article supplement (doi:10.1039/b812700j), 2008-01-01

# Isolation, structure elucidation and total synthesis of a cytotoxic dienone from *Echinacea pallida*

Stefania Morandi<sup>a,b</sup>, Federica Pellati<sup>\*a</sup>, Claudia Ori<sup>b</sup>, Barbara Adinolfi<sup>c</sup>, Paola Nieri<sup>c</sup>, Stefania Benvenuti<sup>a</sup>,  
Fabio Prati<sup>\*b</sup>

## Supplementary Information

|        |                                                          |
|--------|----------------------------------------------------------|
| Page 1 | <sup>1</sup> H NMR of the natural compound <b>10</b>     |
| Page 2 | <sup>13</sup> C NMR of the natural compound <b>10</b>    |
| Page 3 | <sup>1</sup> H NMR of the synthetic compound <b>10a</b>  |
| Page 4 | <sup>13</sup> C NMR of the synthetic compound <b>10a</b> |
| Page 5 | <sup>1</sup> H NMR of the synthetic compound <b>10b</b>  |
| Page 6 | <sup>13</sup> C NMR of the synthetic compound <b>10b</b> |

Natural Compound **10**

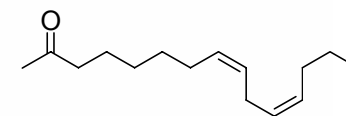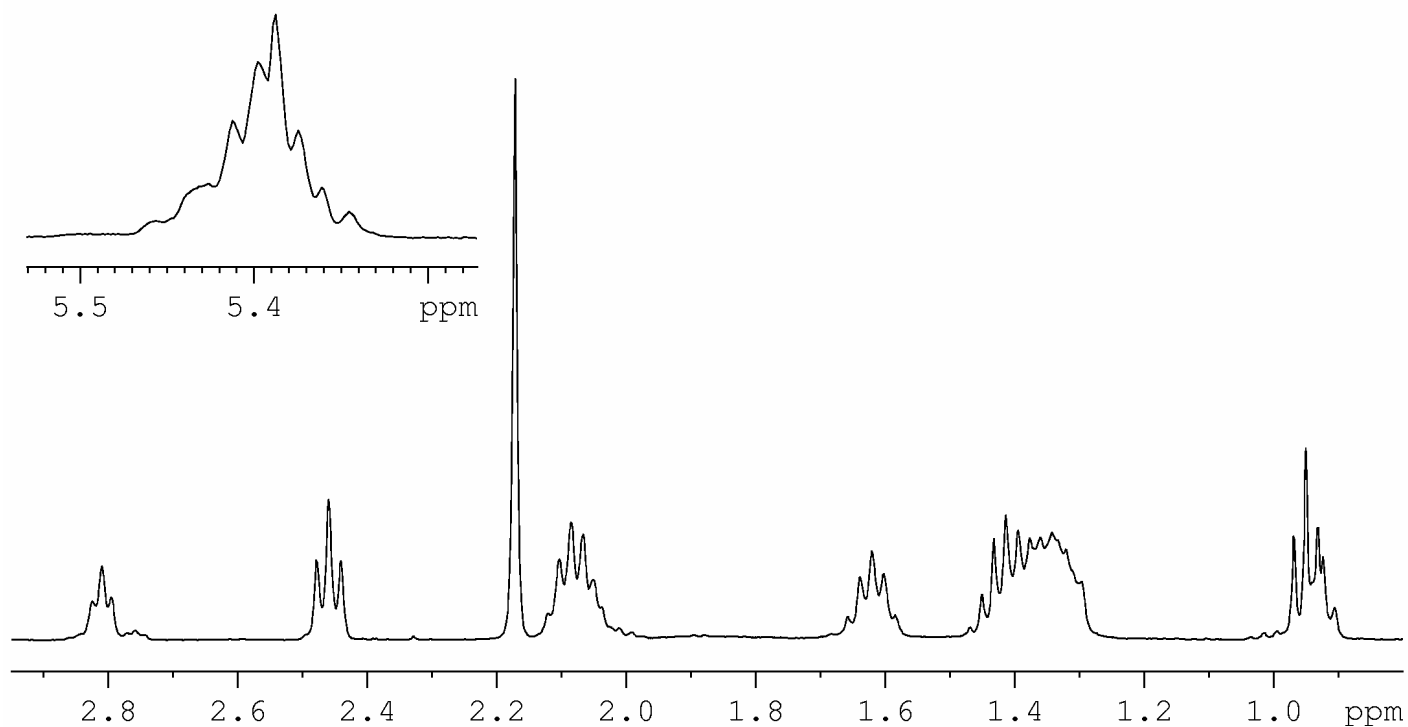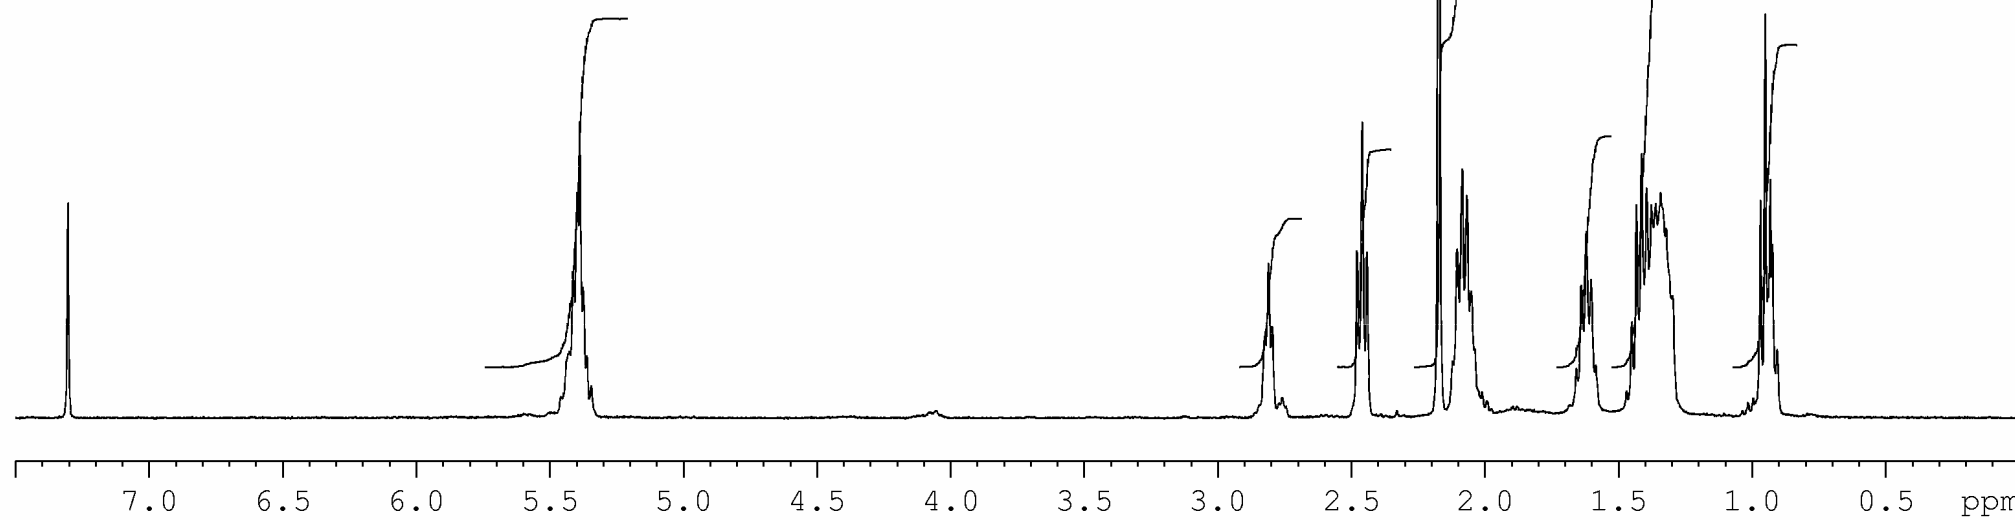

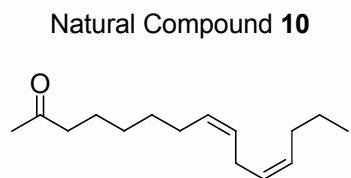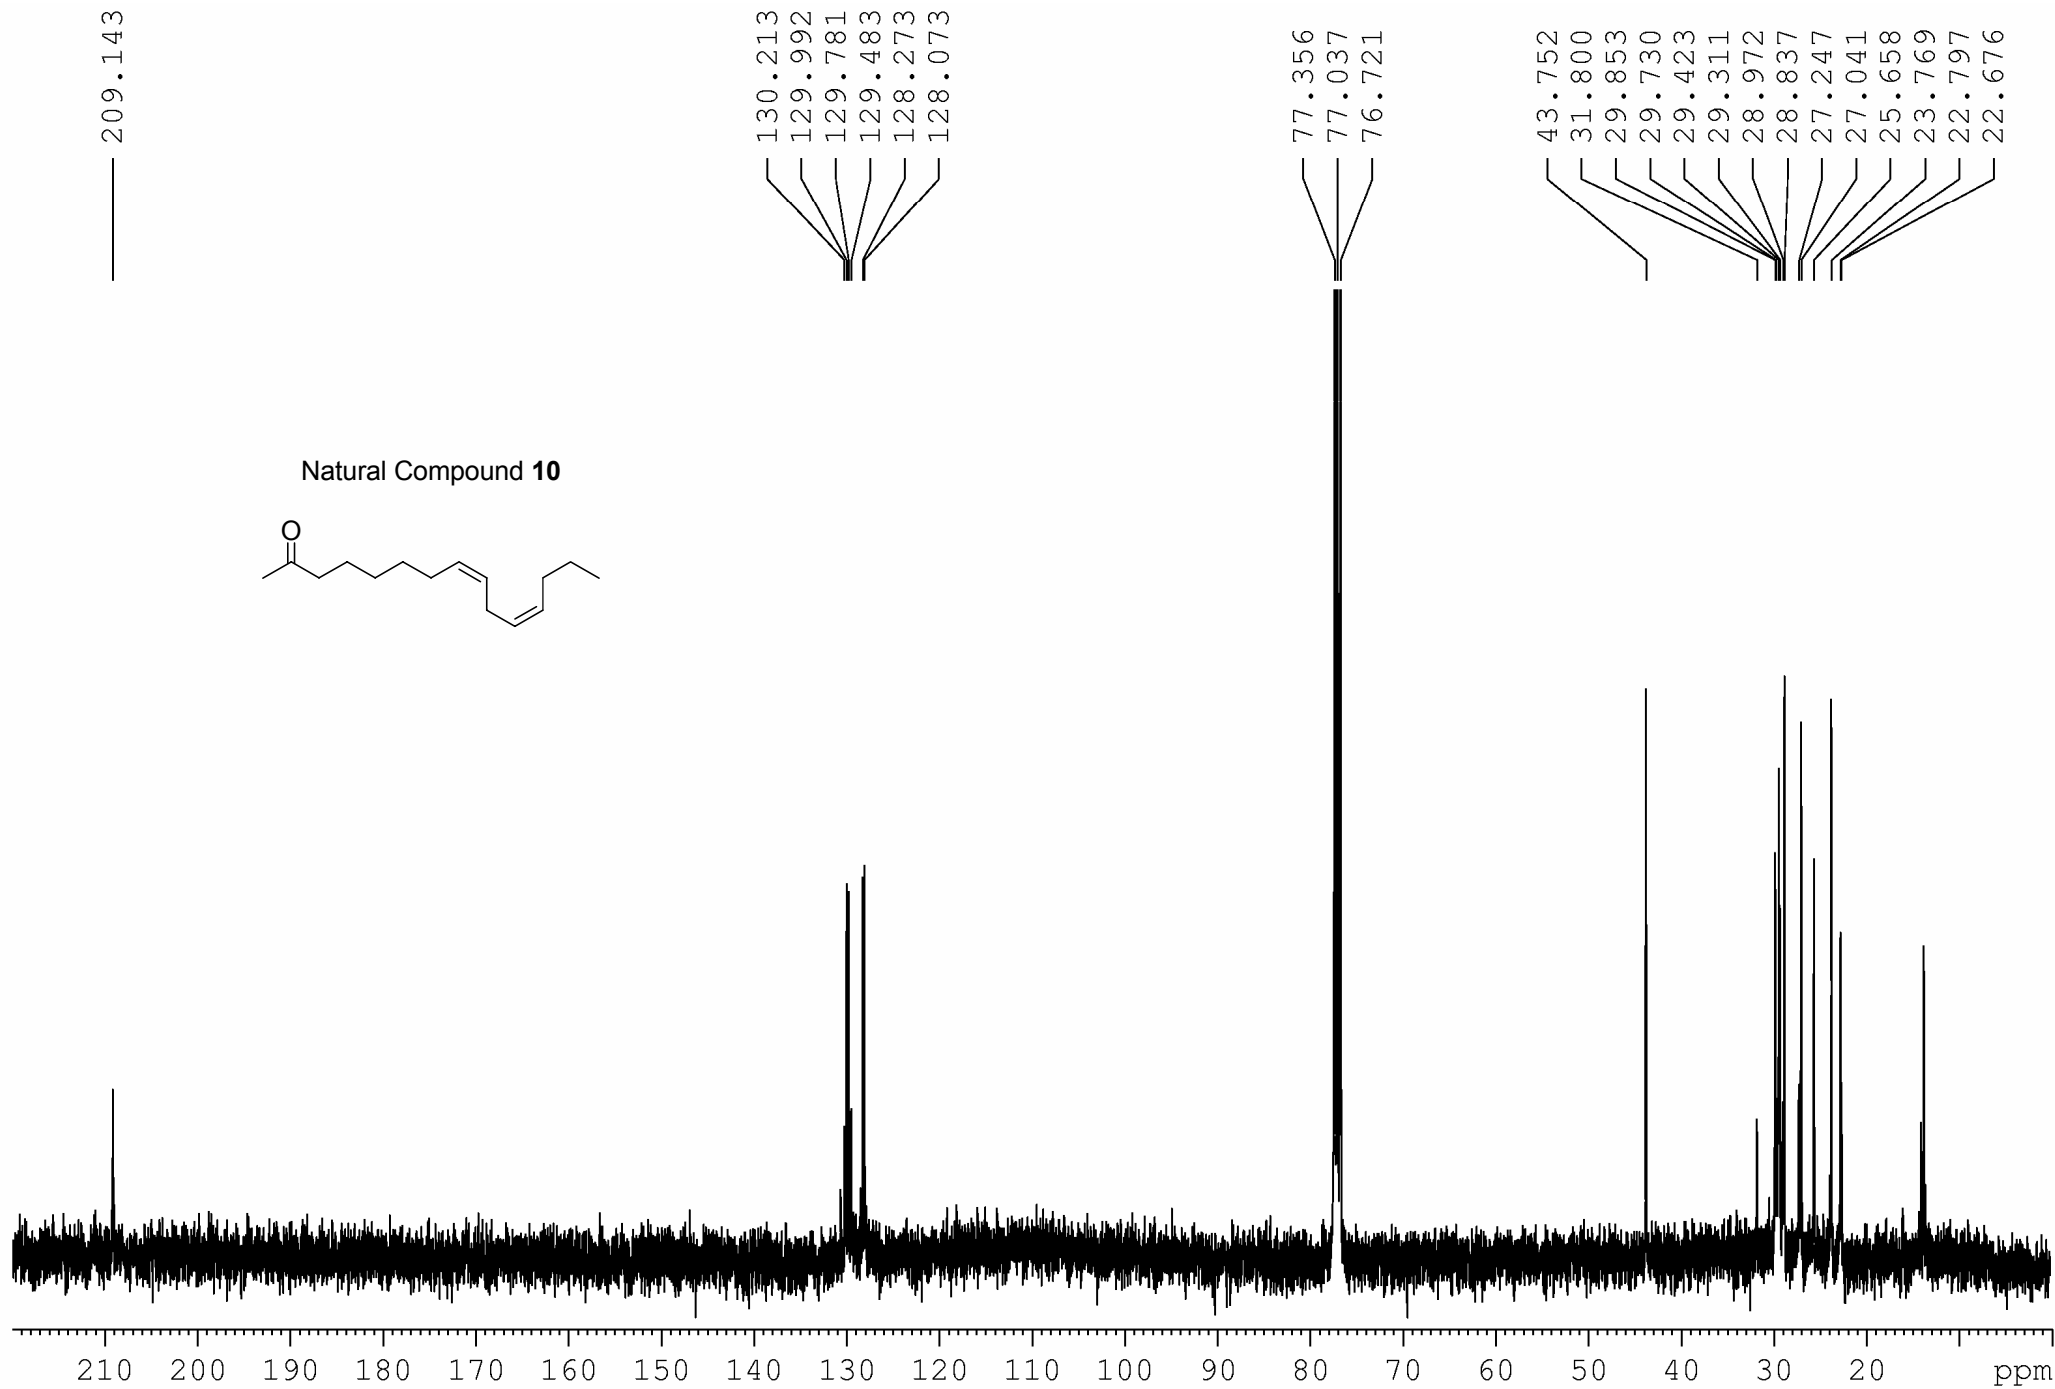

Synthetic Compound **10a**

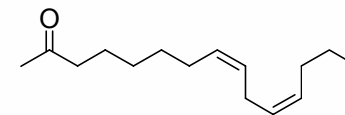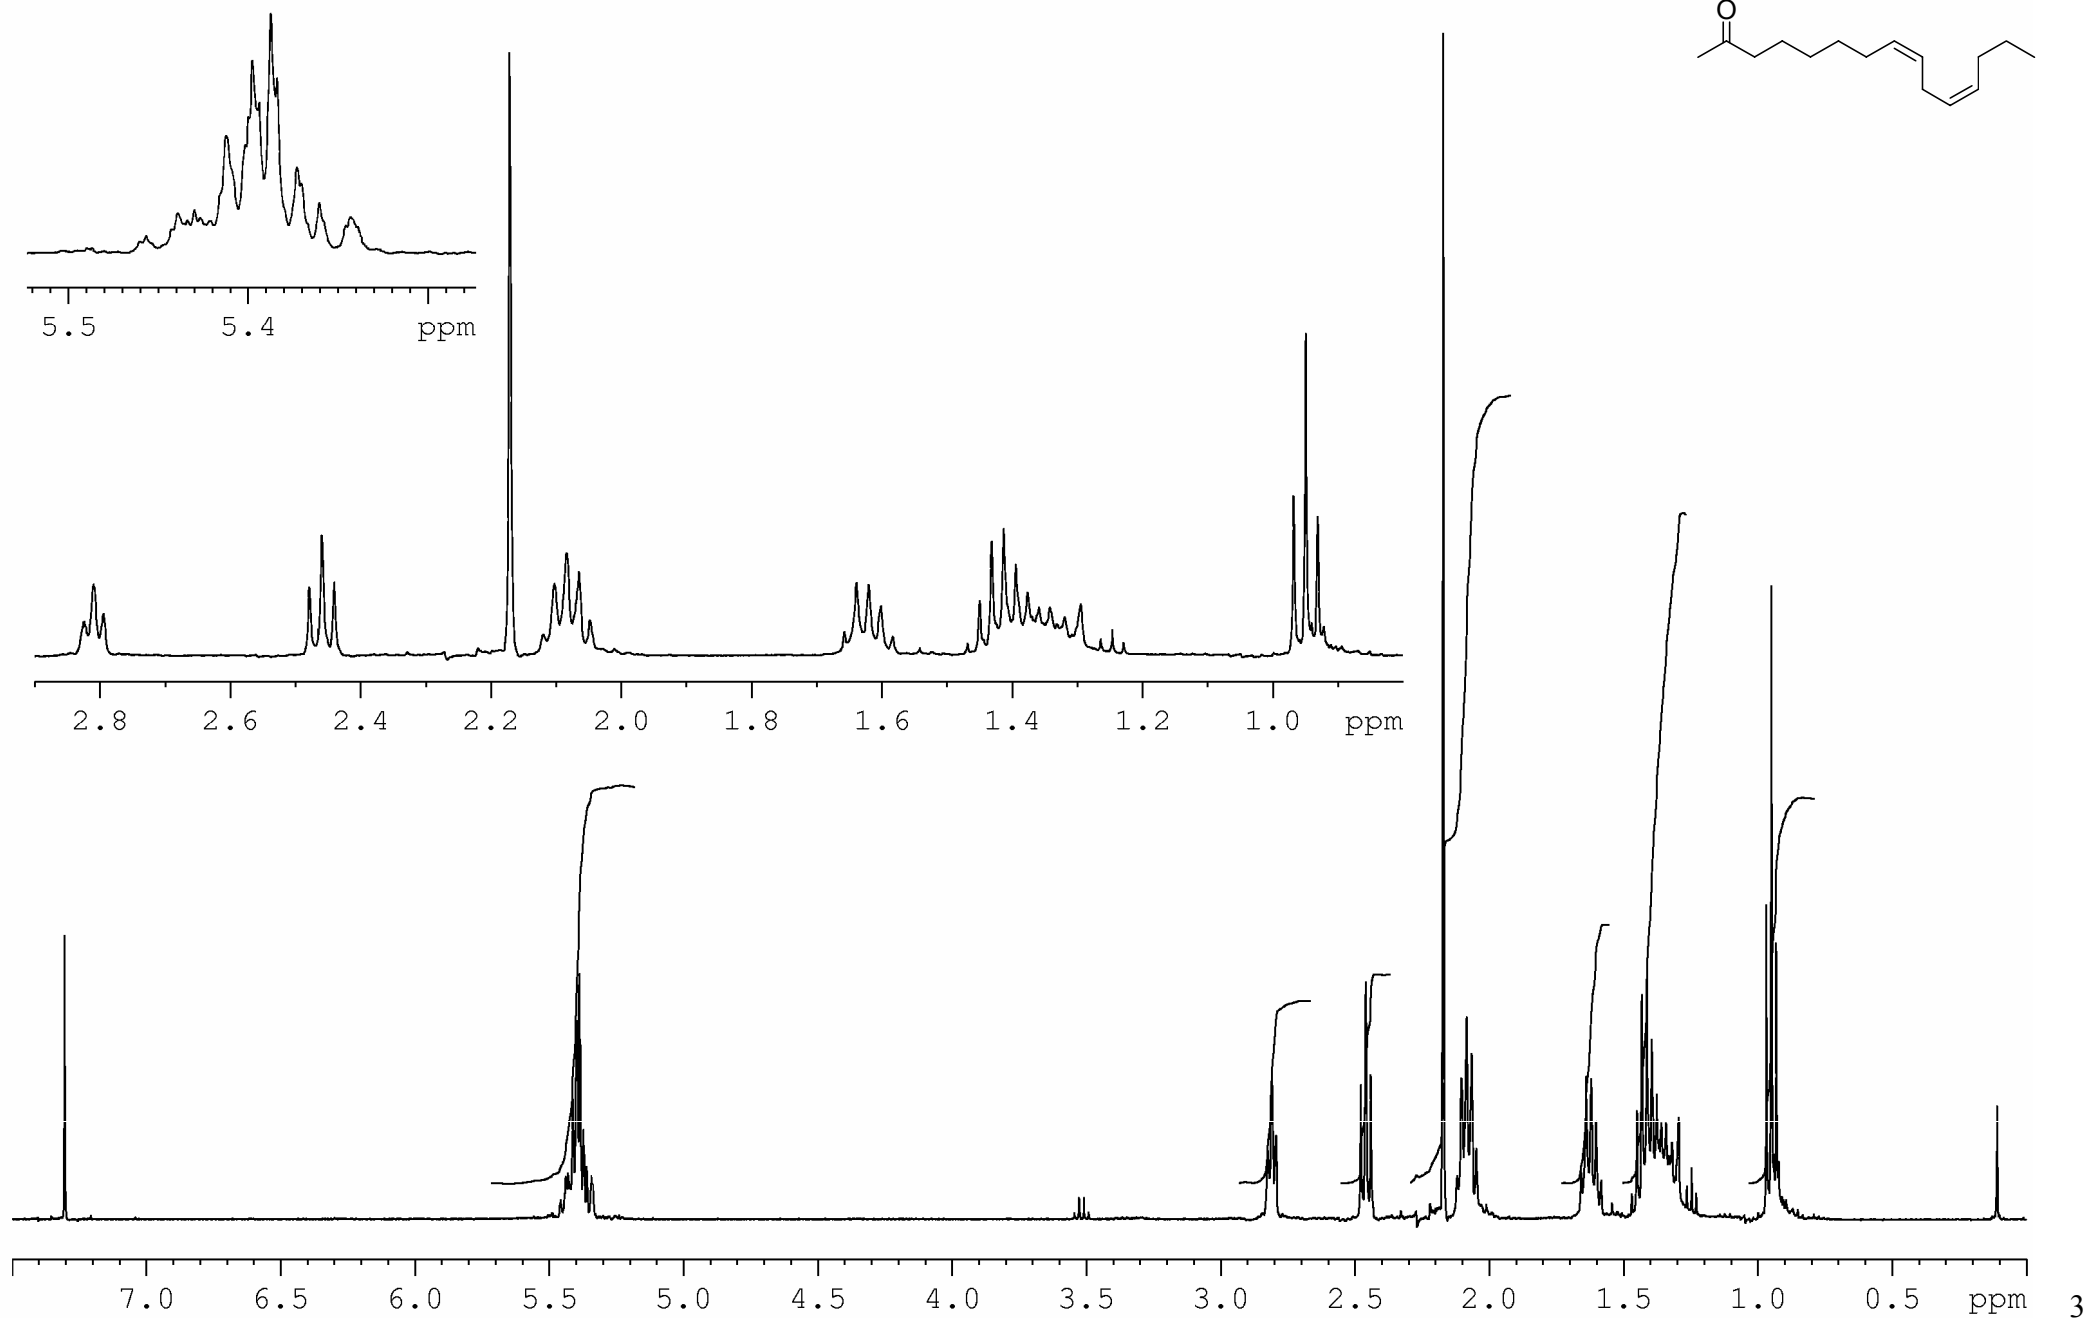

Synthetic Compound **10a**

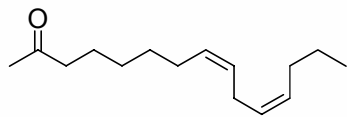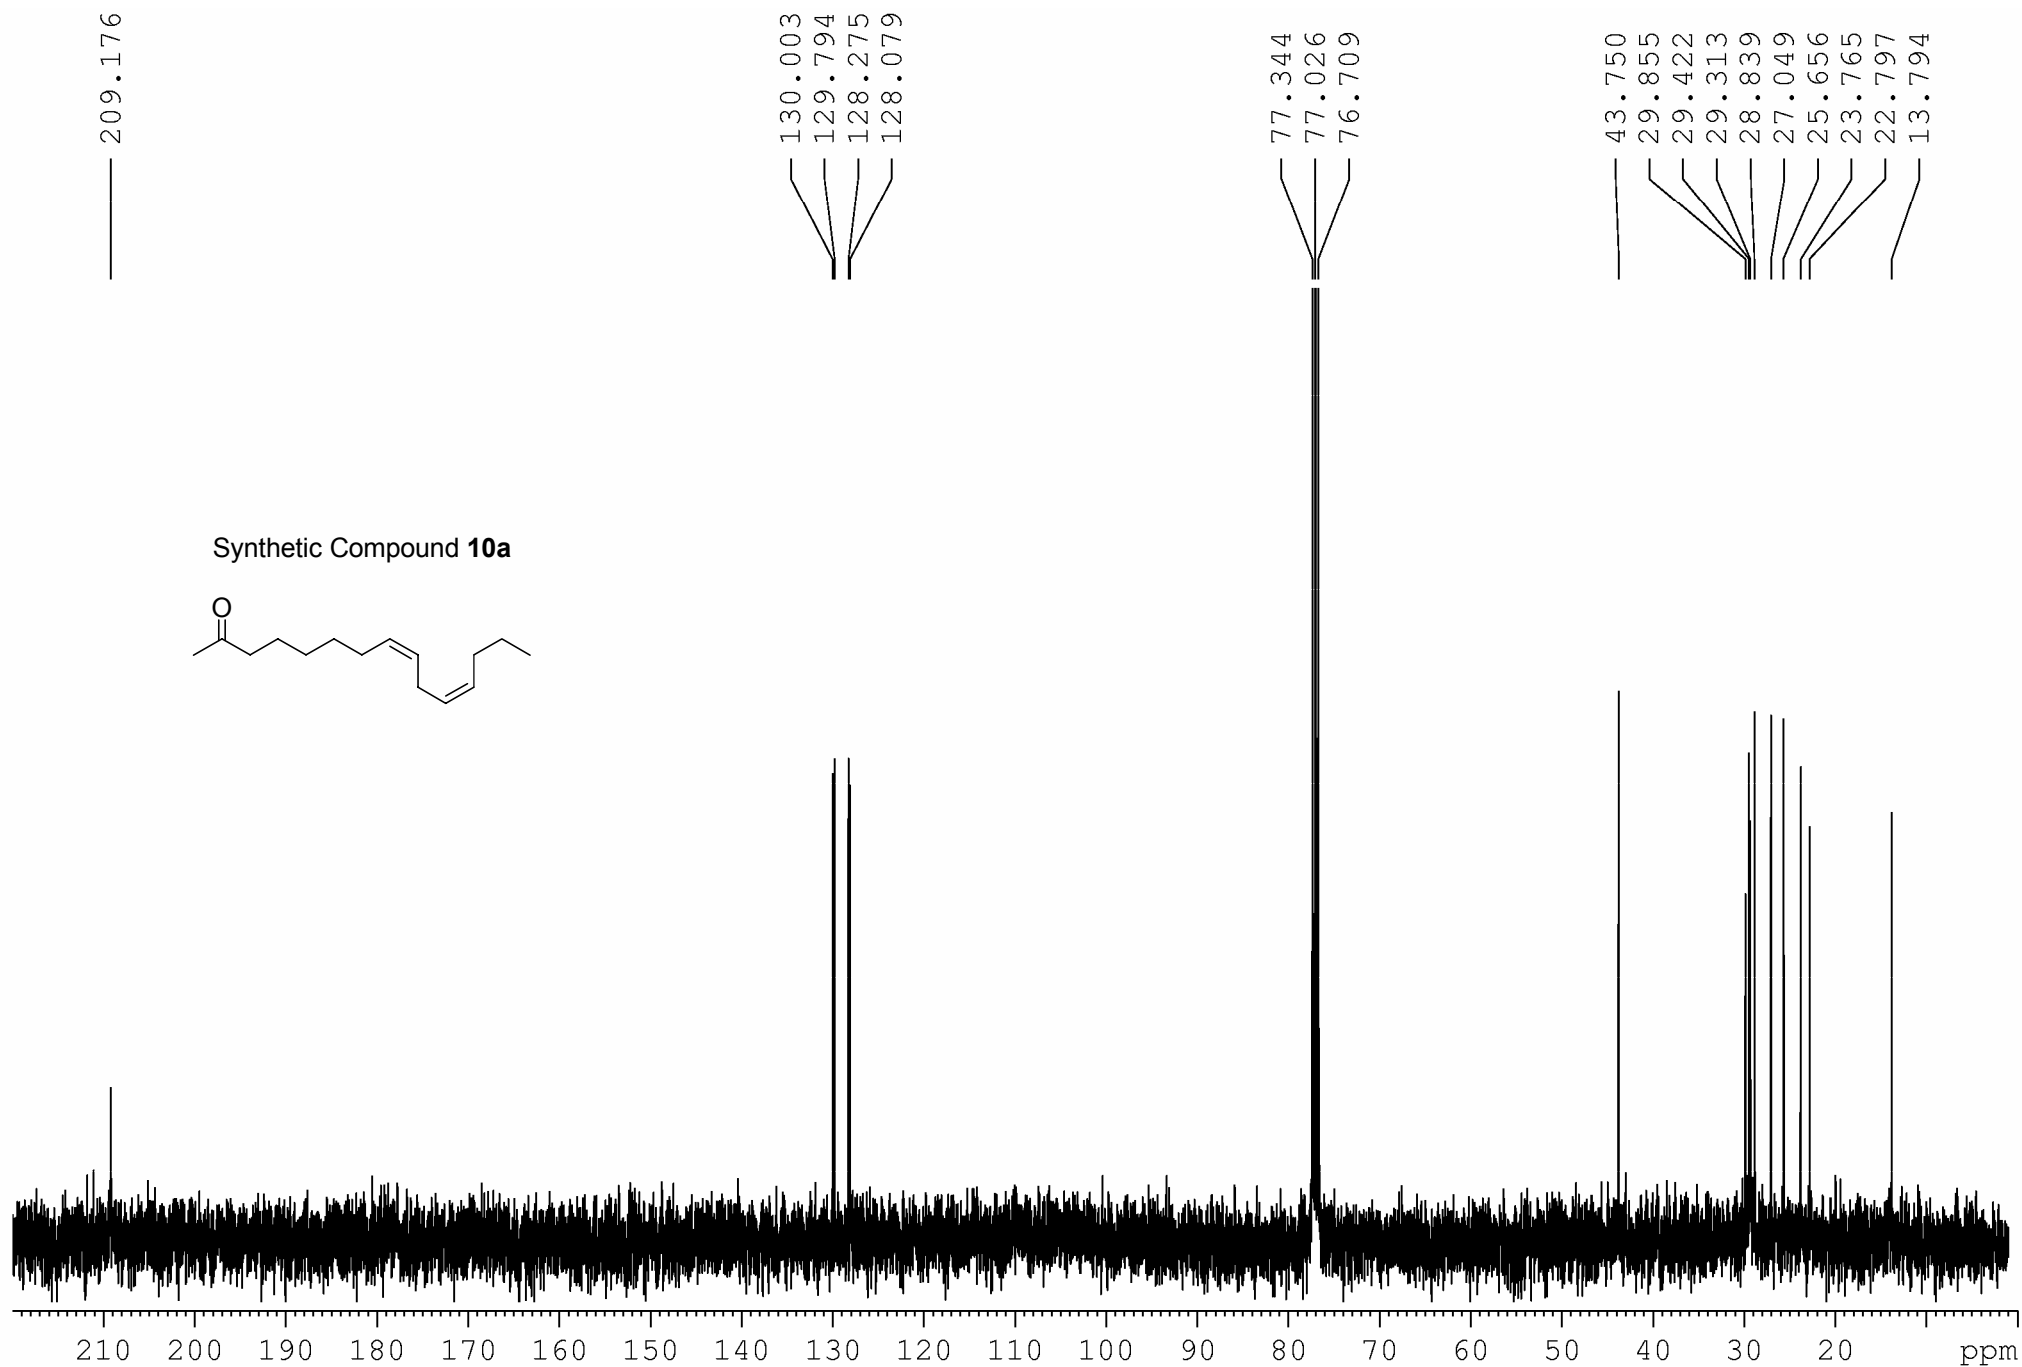

Synthetic Compound **10b**

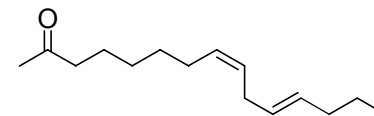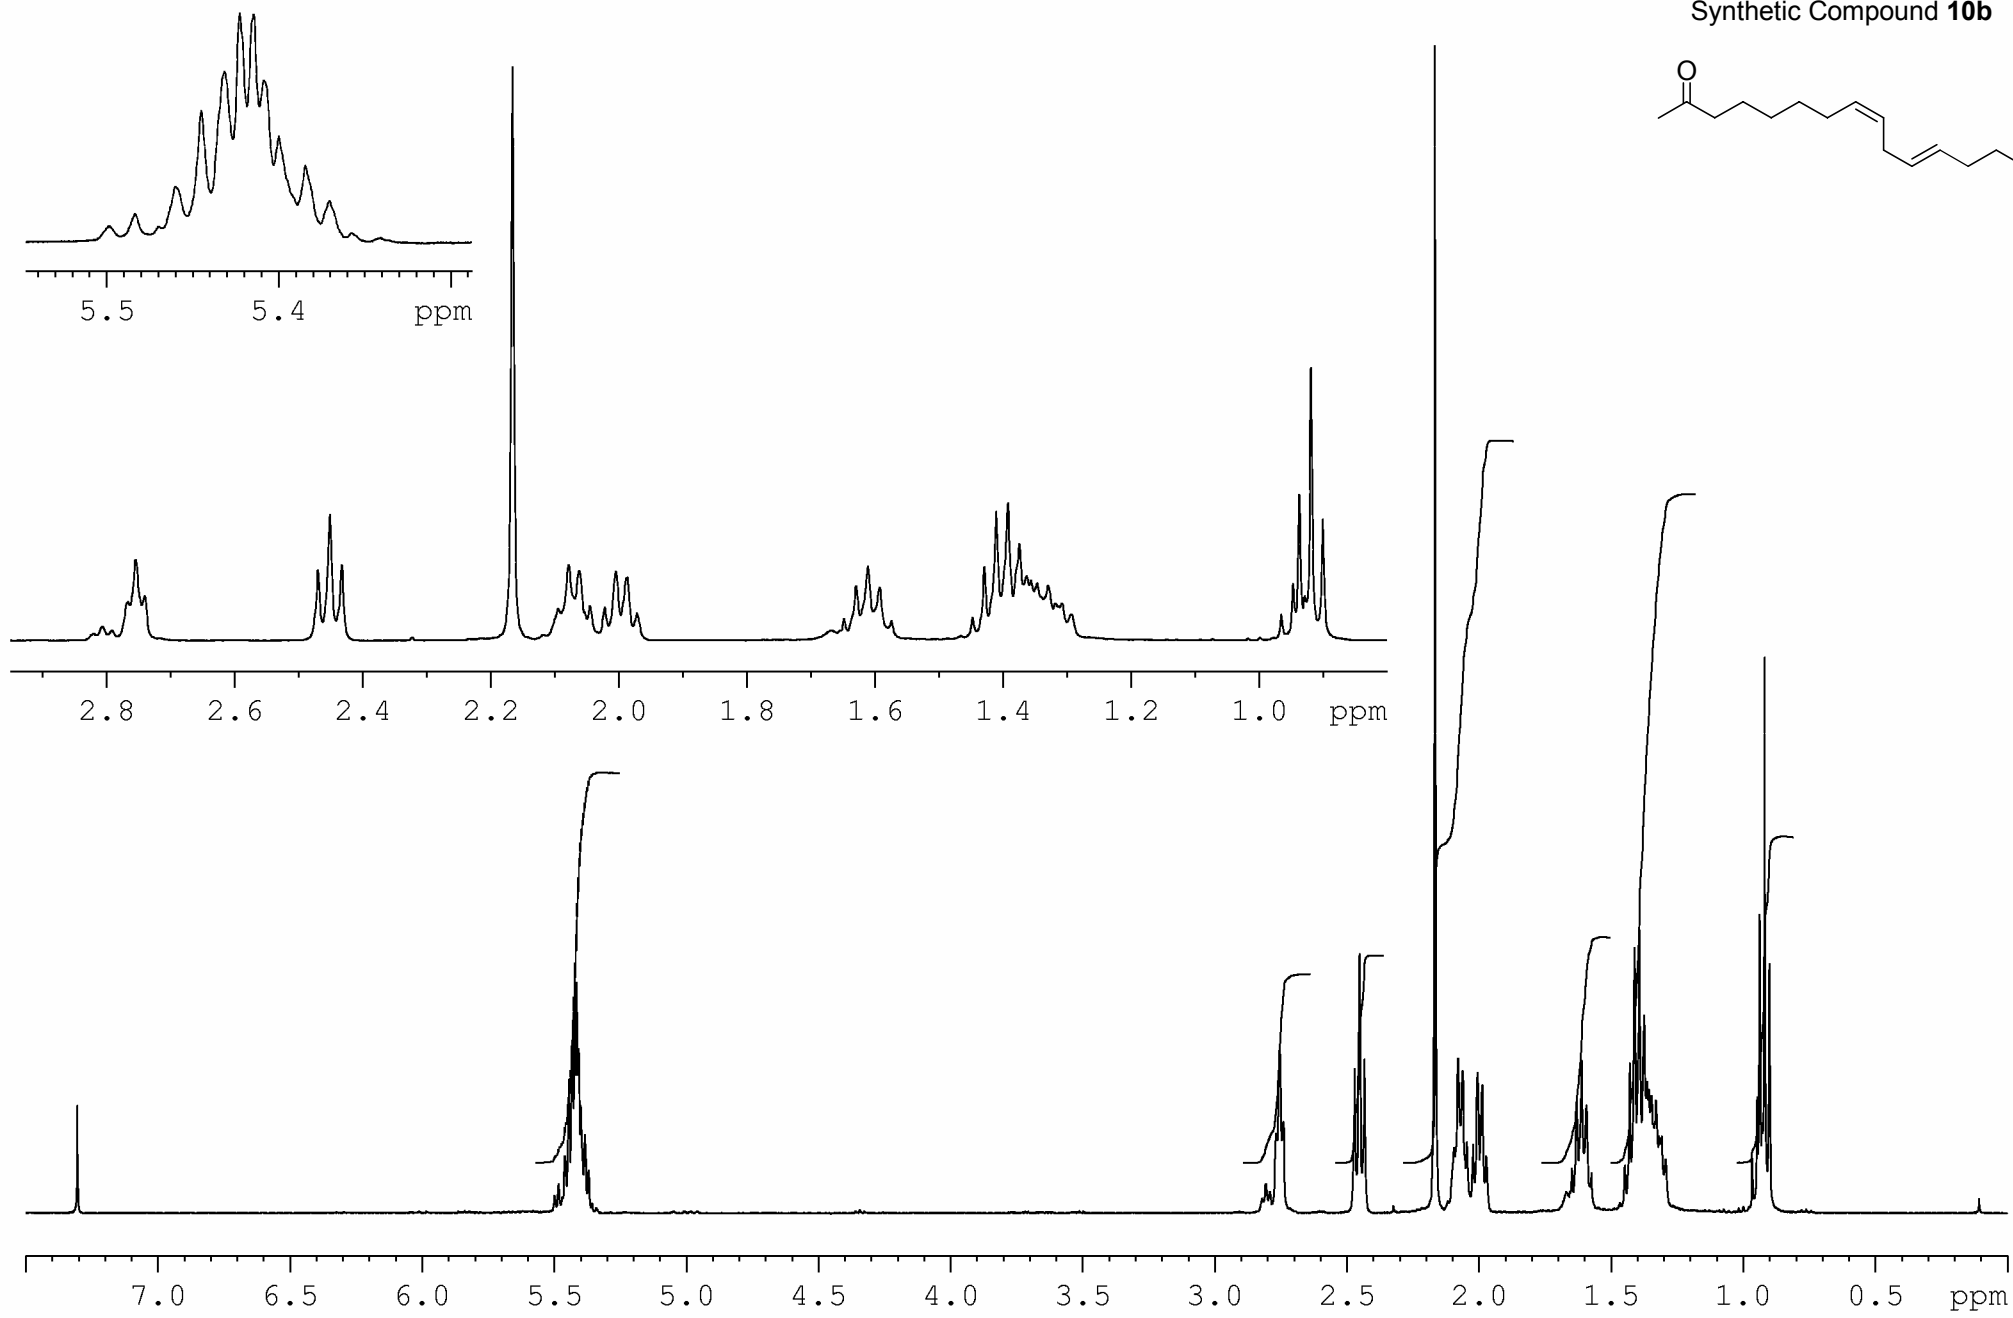

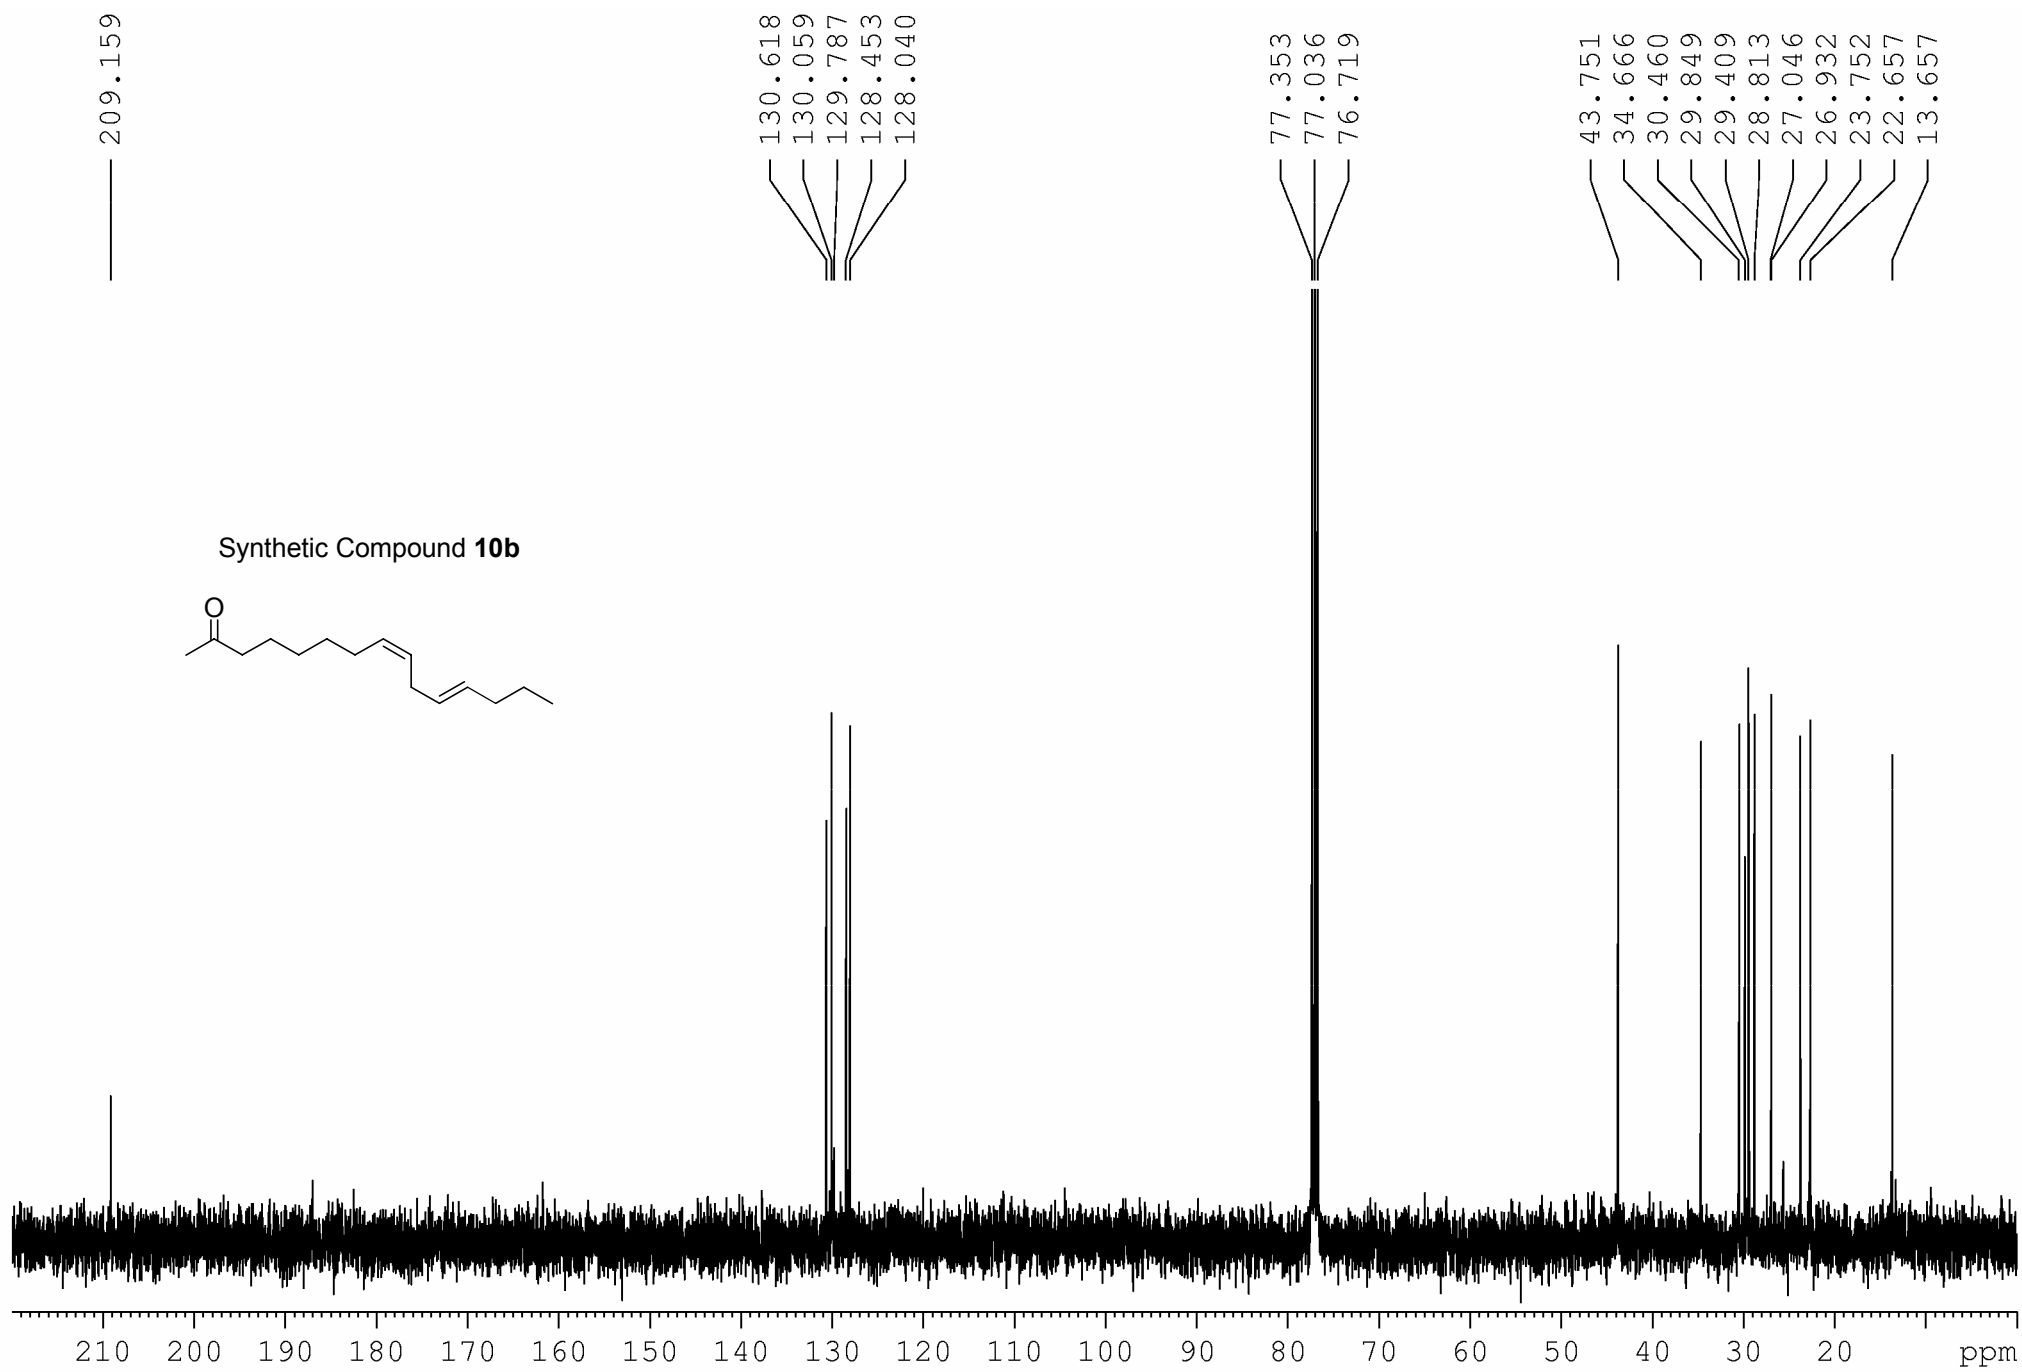

Supplement: b812700j.pdf [file b812700j.pdf]
